# Supplementary material for: An orange-yellow-emitting Lu2−xMg2Al2−yGaySi2O12:xCe3+ phosphor-in-glass film for laser-driven white light
Source: Royal Society of Chemistry journal article supplement (doi:10.1039/d2tc05027g), 2022-12-23
Supplement: d2tc05027g1.pdf [file d2tc05027g1.pdf]

## Supporting Information

### **An Orange-Yellow-Emitting $\text{Lu}_{2-x}\text{Mg}_2\text{Al}_{2-y}\text{Ga}_y\text{Si}_2\text{O}_{12}:\text{xCe}^{3+}$ Phosphor-in-Glass Film for Laser-Driven White Light**

Shisheng Lin,<sup>1</sup> Hang Lin,<sup>1,2,3\*</sup> Pengfei Wang,<sup>1,4</sup> Ping Sui,<sup>1,4</sup> Hongyi Yang,<sup>5</sup> Ju Xu,  
<sup>1</sup> Yao Cheng, <sup>1</sup> Yuansheng Wang<sup>1,\*</sup>

<sup>1</sup> Key Laboratory of Optoelectronic Materials Chemistry and Physics, Fujian Institute of Research on the Structure of Matter, Chinese Academy of Sciences, Fuzhou, Fujian, 350002 (P. R. China)

E-mail: [lingh@fjirsm.ac.cn](mailto:lingh@fjirsm.ac.cn); E-mail: [ywang@fjirsm.ac.cn](mailto:ywang@fjirsm.ac.cn);

<sup>2</sup> Fujian Science & Technology Innovation Laboratory for Optoelectronic Information of China, Fuzhou, Fujian, 350108 (P. R. China)

<sup>3</sup> State Key Laboratory of Structural Chemistry, Fuzhou, Fujian, 350002 (P. R. China)

<sup>4</sup> College of Chemistry and Materials Science, Fujian Normal University, Fuzhou, Fujian, 350007 (P. R. China)

<sup>5</sup> Xiamen Institute of Rare-earth Materials, Haixi Institutes, Chinese Academy of Sciences, Xiamen, Fujian, 361000 (P. R. China)

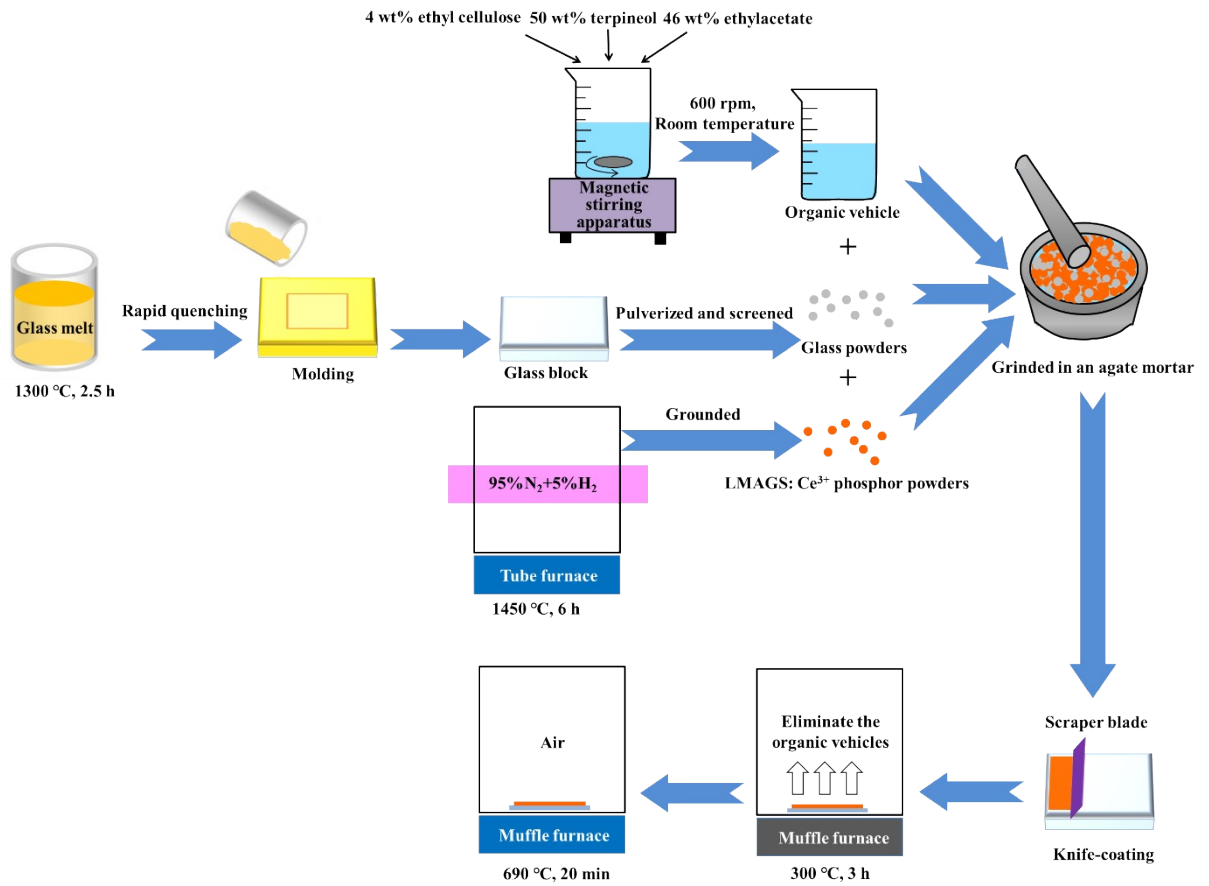

**Figure S1.** Schematical illustration of preparation procedure of the LMAGS: Ce<sup>3+</sup> PiG film-on-SP.

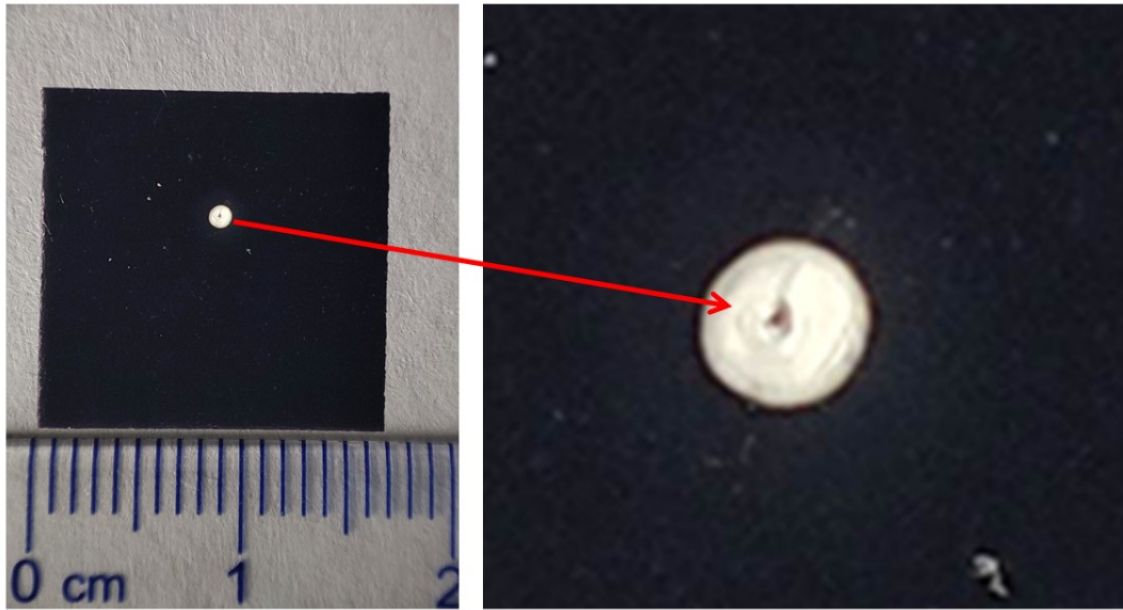

**Figure S2.** Photograph of the photo-sensitive paper upon blue laser irradiation

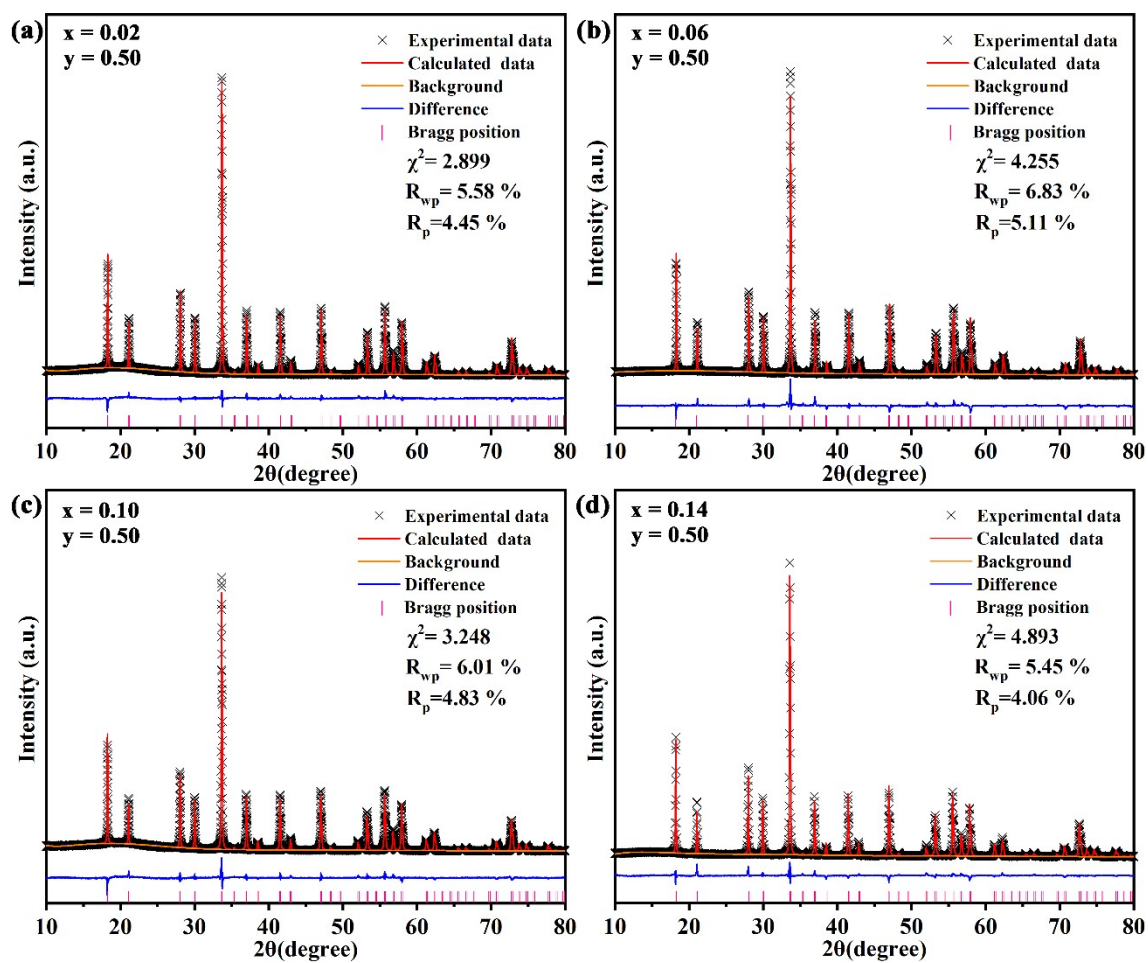

**Figure S3.** Rietveld refinement on Lu<sub>2.0-x</sub>Mg<sub>2</sub>Al<sub>1.5</sub>Ga<sub>0.5</sub>Si<sub>2</sub>O<sub>12</sub>: xCe<sup>3+</sup> phosphor, showing the observed (black crosses) and calculated (red line) XRD profiles, and the difference between them (blue line).

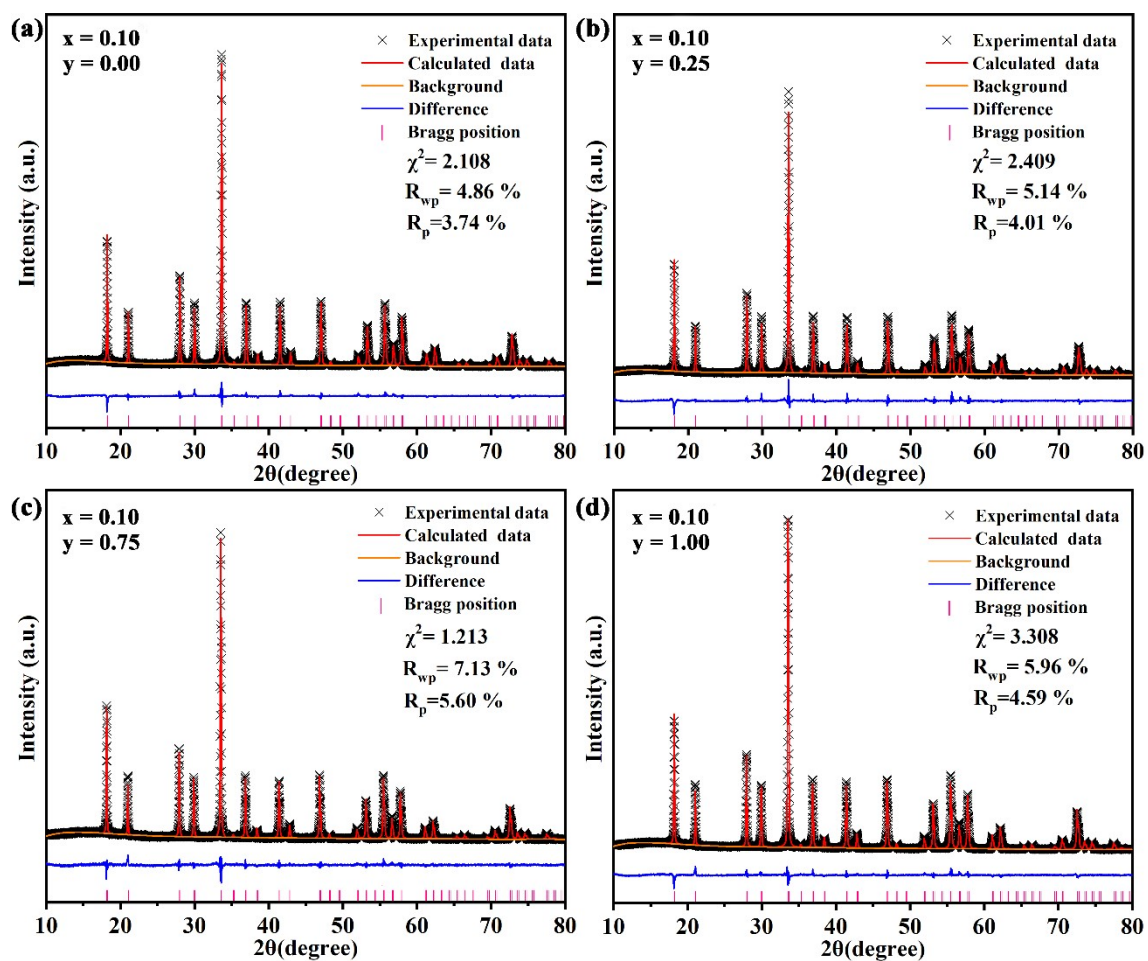

**Figure S4.** Rietveld refinement on  $\text{Lu}_{1.9}\text{Mg}_2\text{Al}_{2.0-y}\text{Ga}_y\text{Si}_2\text{O}_{12}: 0.1\text{Ce}^{3+}$  phosphor, showing the observed (black crosses) and calculated (red line) XRD profiles, and the difference between them (blue line).

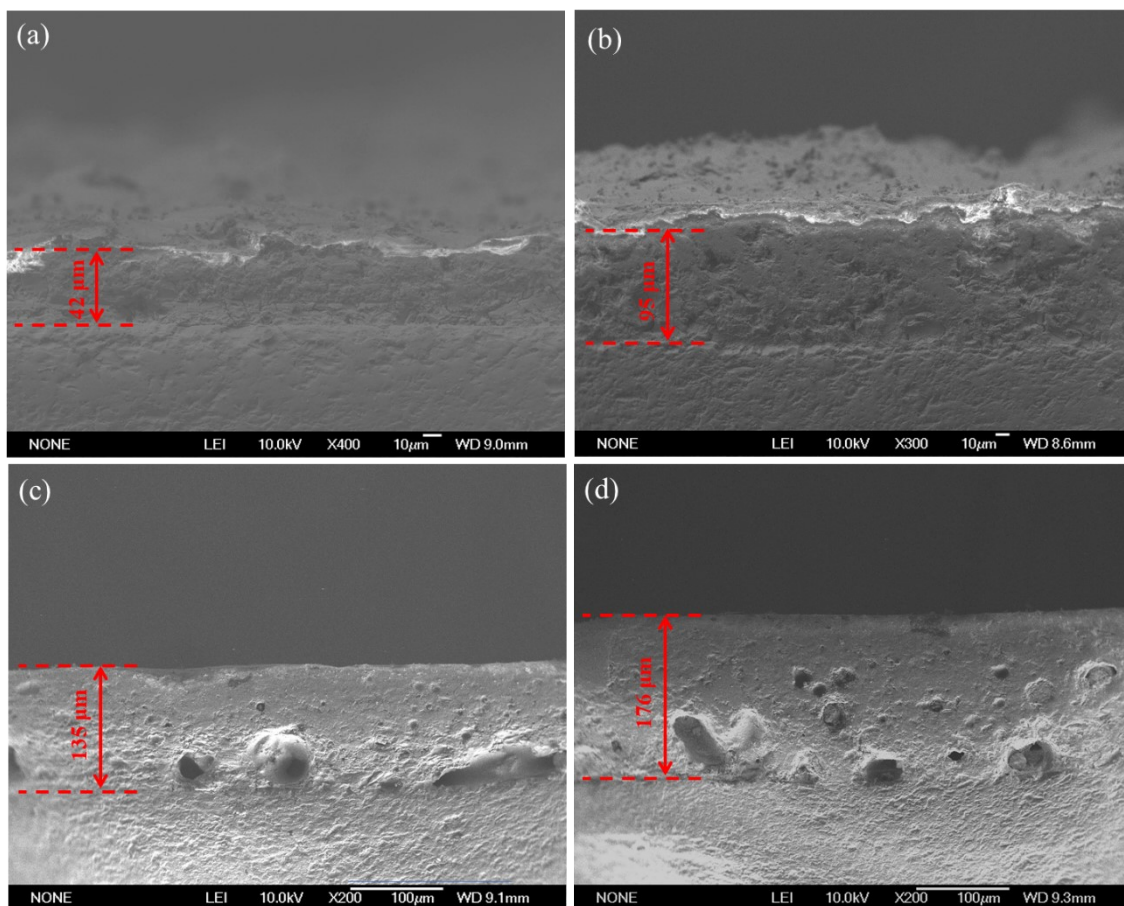

**Figure S5.** SEM observations on the cross section of LMAGS: Ce<sup>3+</sup> PiG film-on-SP with different film thickness.

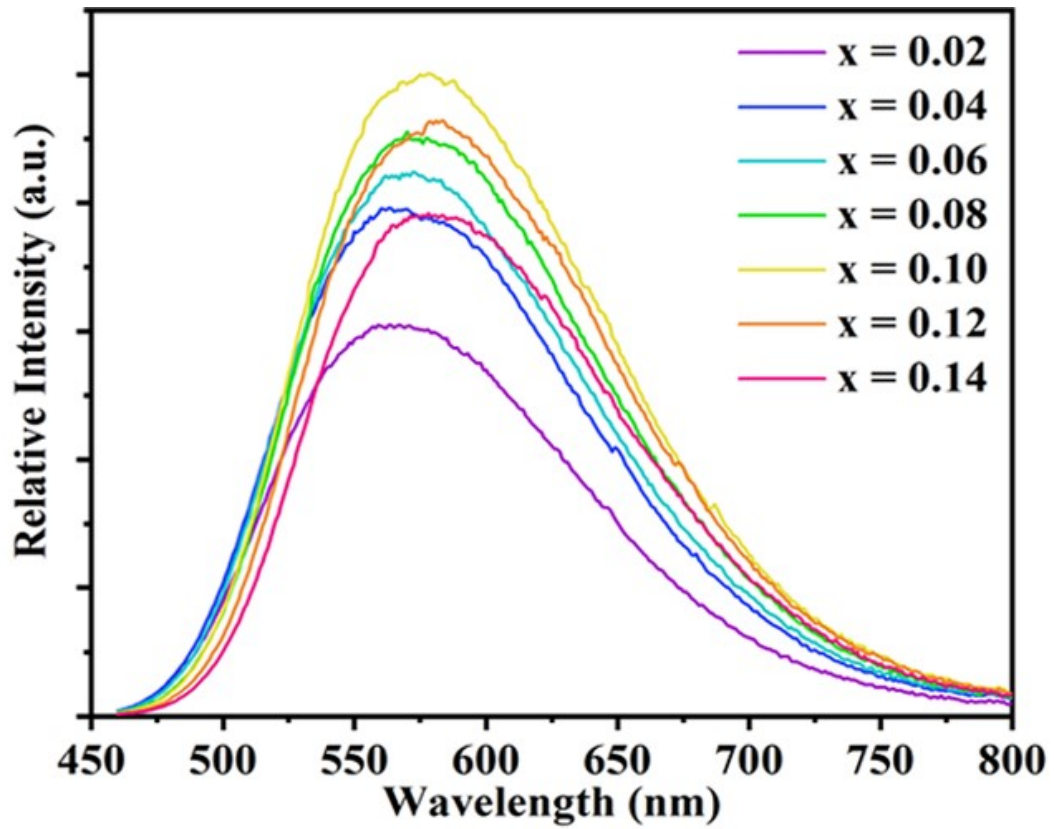

Figure S6. PL spectra of  $\text{Lu}_{2.0-x}\text{Mg}_2\text{Al}_{1.5}\text{Ga}_{0.5}\text{Si}_2\text{O}_{12}: x\text{Ce}^{3+}$  PiG film-on-SP under 450 nm excitation.

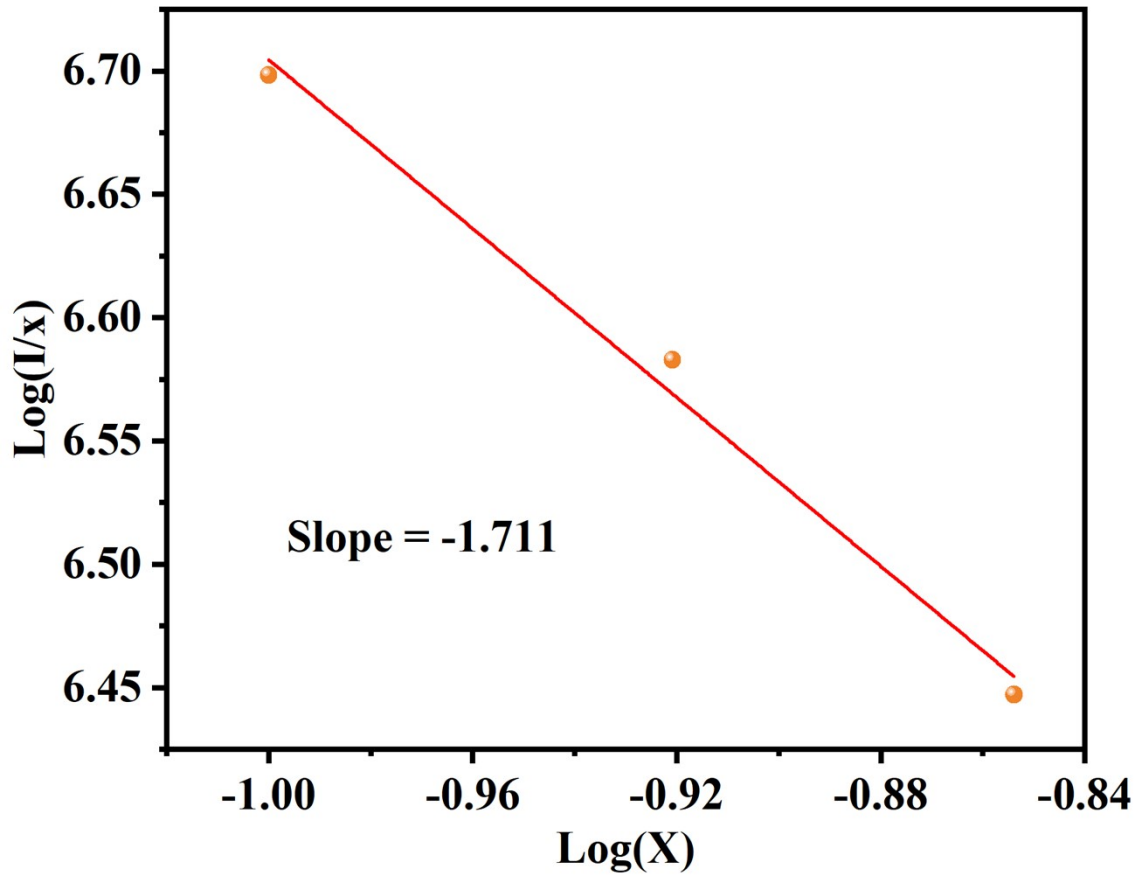

**Figure S7.** Relationship between  $\log(x)$  and  $\log(I/x)$  in the  $\text{Lu}_{2.0-x}\text{Mg}_2\text{Al}_{1.5}\text{Ga}_{0.5}\text{Si}_2\text{O}_{12}: x\text{Ce}^{3+}$  phosphor.

Discussions on Figure S7:

In order to study the concentration quenching mechanism, the parameter of  $R_c$  reflecting the average distance of  $\text{Ce}^{3+}$  is introduced by using the following expression [1]:

$$R_c \approx 2 \left[ \frac{3V}{4\pi x_c N} \right]^{1/3} \quad (1)$$

where  $V$  is the volume of unit cell,  $x_c$  the critical concentration of activator and  $N$  the number of available sites for the dopant in a unit cell. Taken  $V=1688.219 \text{ \AA}^3$ ,  $x_c=0.10$ , and  $N=8$ ,  $R_c$  is evaluated to be  $\sim 16 \text{ \AA}$ . The electronic exchange interaction should be only effective at  $R_c < 5 \text{ \AA}$  to achieve energy transfer among  $\text{Ce}^{3+}$  ions. As such, the electric multipolar-multipolar interaction should be the main mechanism. Then, we adopted the Dexter theory to analyze the type of multipolar-



multipolar interaction by the following equation [2]:

$$I/x = K \left[ 1 + \beta(x)^{\frac{\theta}{3}} \right]^{-1} \quad (2)$$

where  $K$  and  $\beta$  are constants,  $\theta=6, 8, 10$  means the electric multipole index corresponding to the dipole-dipole (d-d), dipole-quadrupole (d-q) and quadrupole-quadrupole (q-q) interaction, respectively. By plotting  $\log(I/x)$  versus  $\log(x)$ ,  $\theta$  is calculated as 5.13, indicating that the main mechanism for concentration quenching in LMAGS:  $\text{Ce}^{3+}$  is the d-d electric multipolar-multipolar interaction.

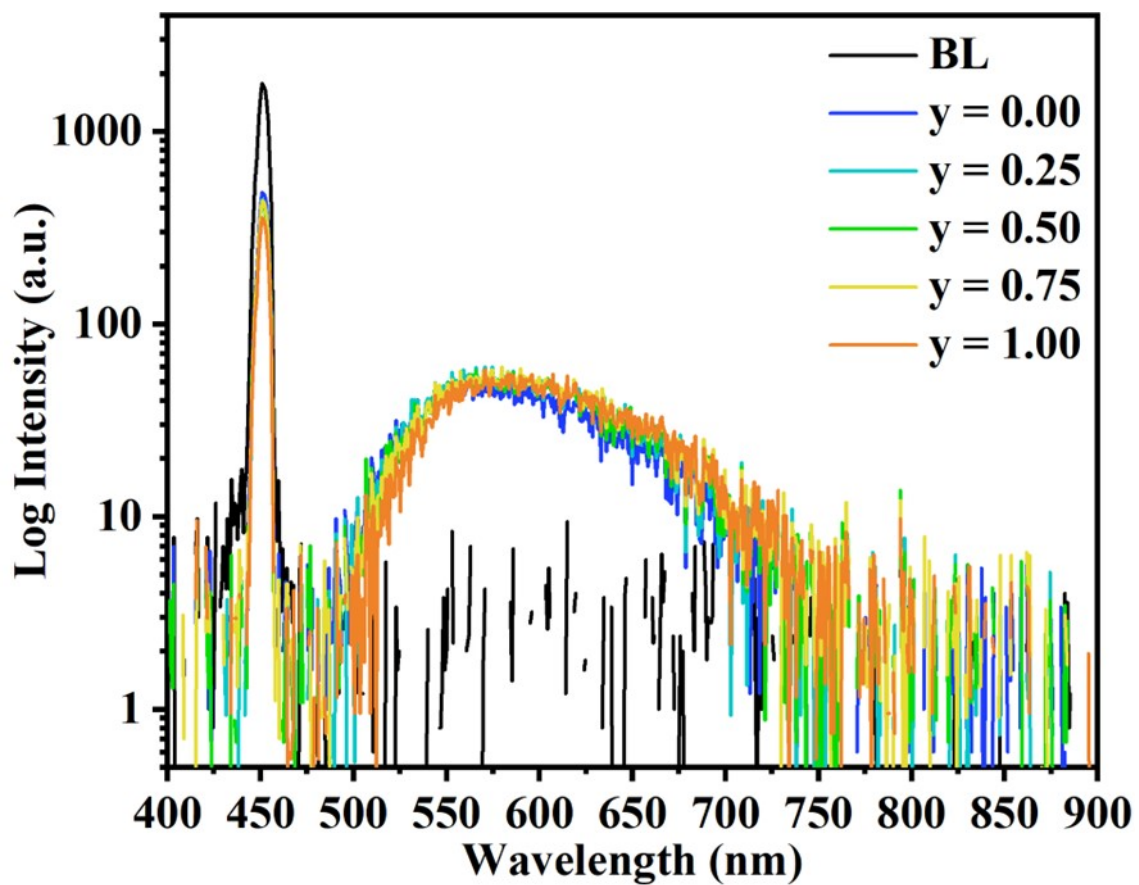

**Figure S8.** The measured luminescent curves of  $\text{Lu}_{1.9}\text{Mg}_2\text{Al}_{2.0-y}\text{Ga}_y\text{Si}_2\text{O}_{12}: 0.1\text{Ce}^{3+}$  PiG film-on-SP to calculate quantum efficiency.

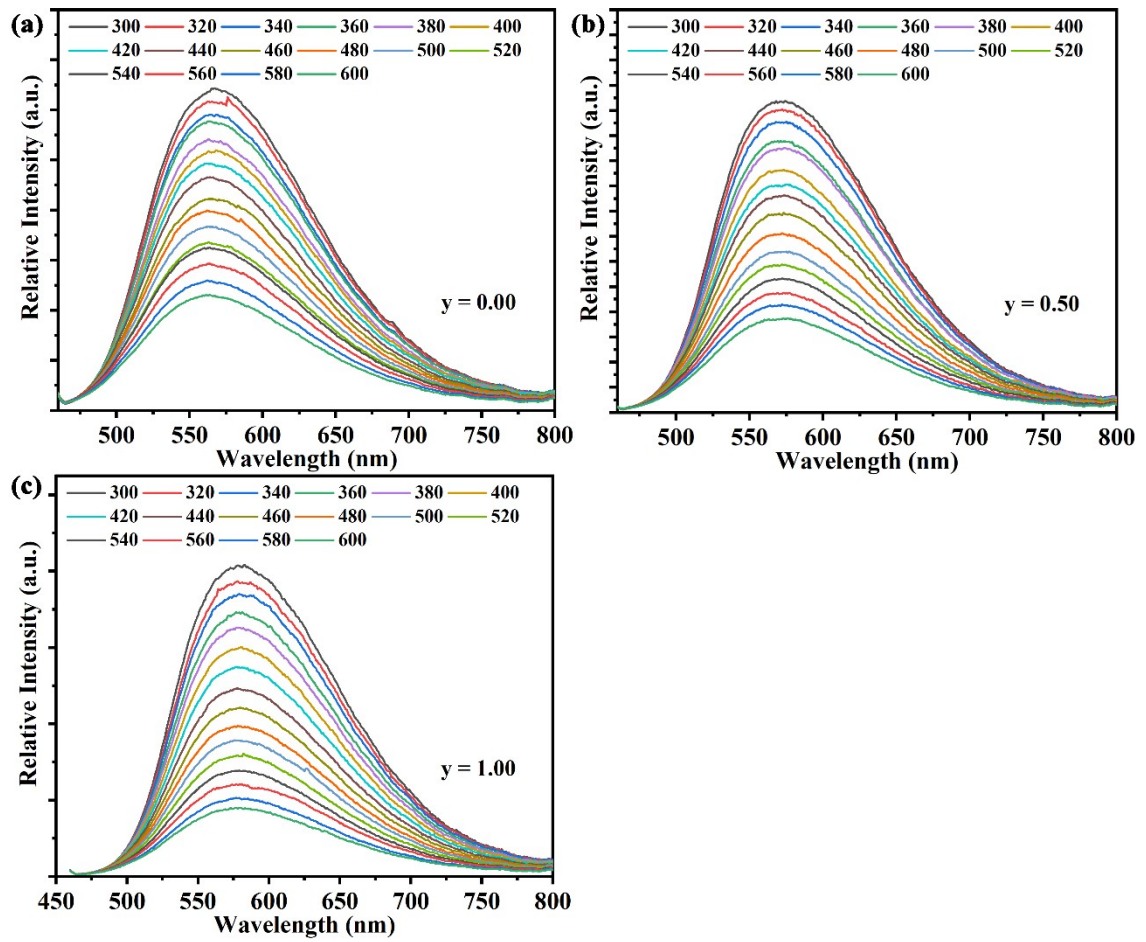

**Figure S9.** Temperature-dependent PL spectra in  $\text{Lu}_{1.9}\text{Mg}_2\text{Al}_{2.0-y}\text{Ga}_y\text{Si}_2\text{O}_{12}: 0.1\text{Ce}^{3+}$  PiG film-on-SP from 300 to 600 K under 450 nm excitation.

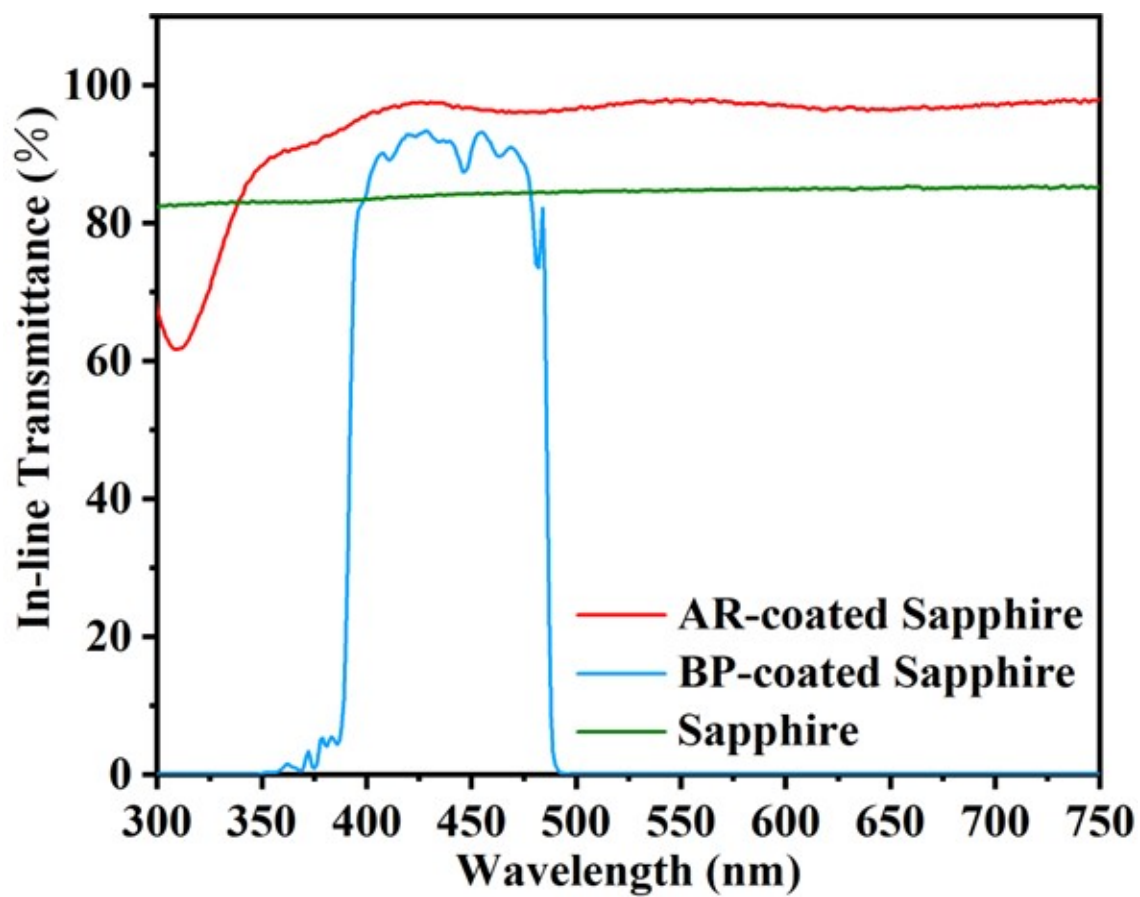

Figure S10. In-line transmittance spectra of sapphire, AR-coated sapphire and BP-coated sapphire.

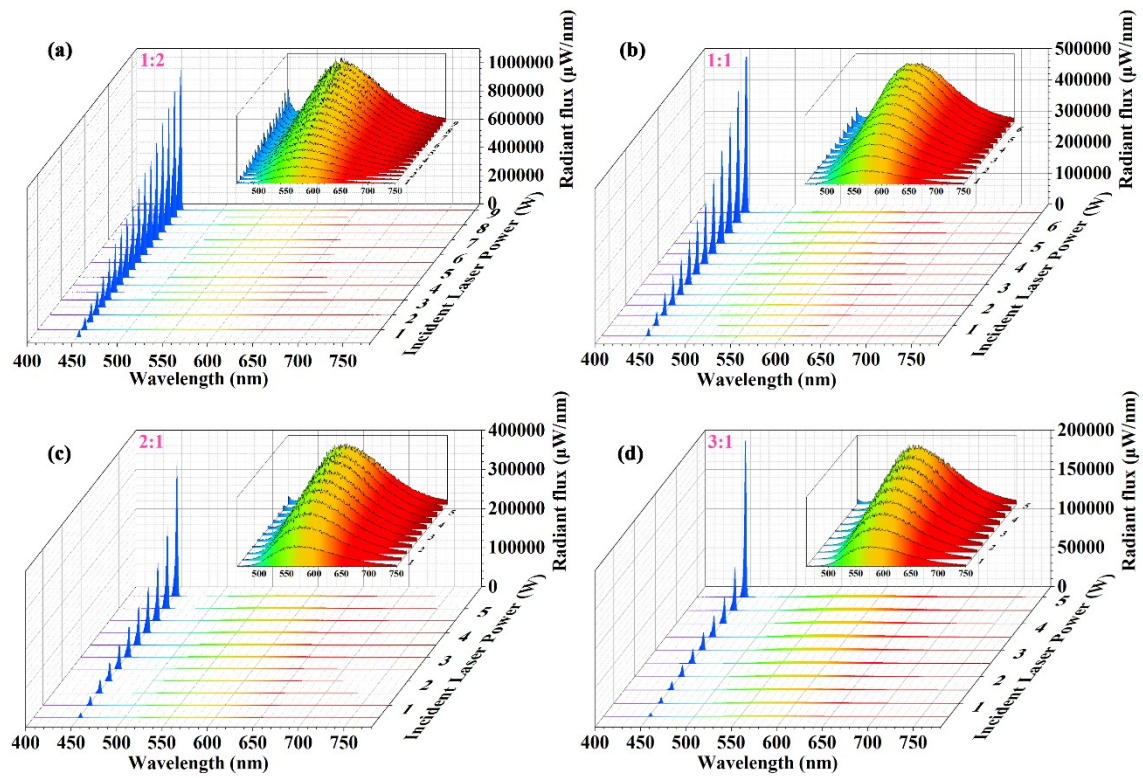

**Figure S11.**  $P_{\text{in}}$  dependent electroluminescent spectra of LMGs: Ce<sup>3+</sup> PiG film-on-SP with different mass ratios of LMGs: Ce<sup>3+</sup> phosphor to glass powders.

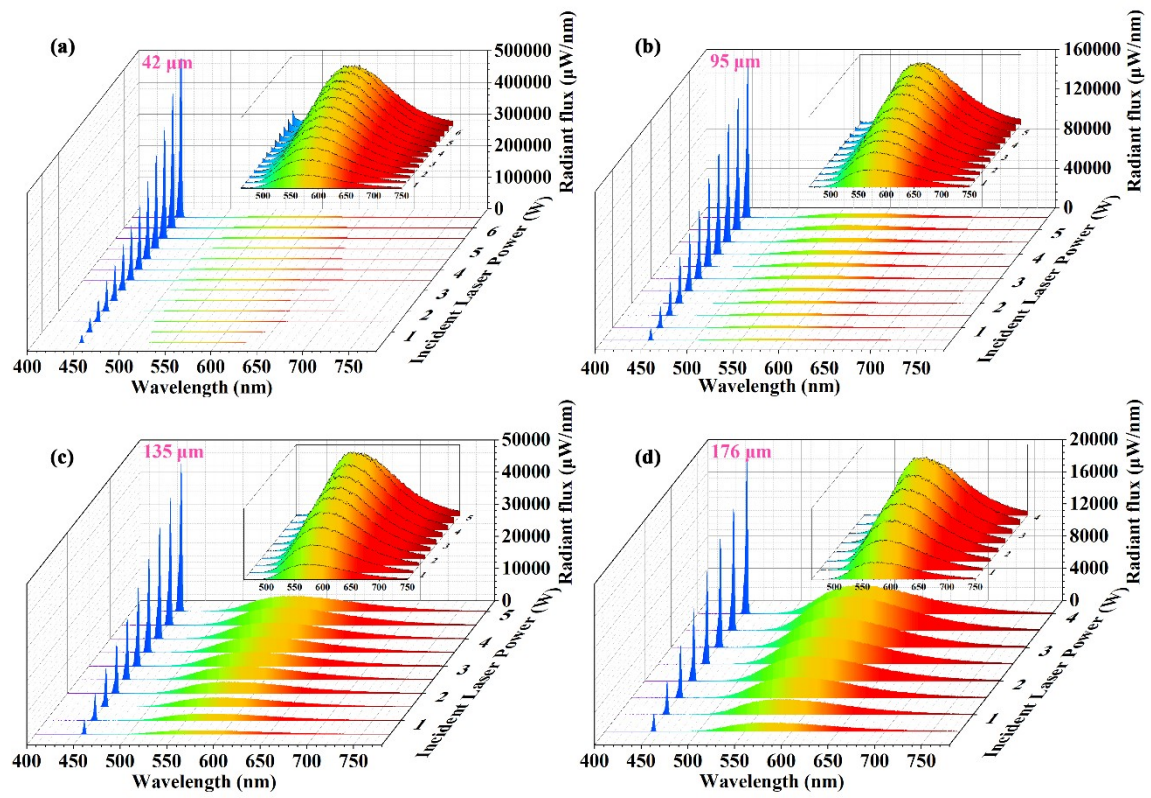

**Figure S12.**  $P_{in}$  dependent electroluminescent spectra of L MAGS: Ce<sup>3+</sup> PiG film-on-SP with different film thickness.

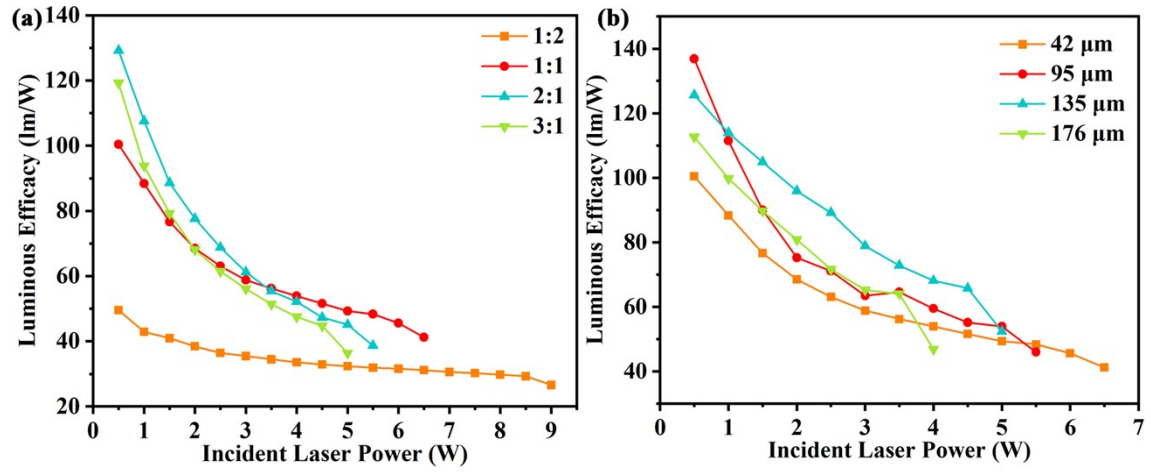

**Figure S13.** Pumping power dependent luminous efficacy of the LMAGS: Ce<sup>3+</sup> PiG film-on-SP with (a) different weight ratios of LMAGS: Ce<sup>3+</sup> phosphor to glass powders and (b) different film thicknesses.

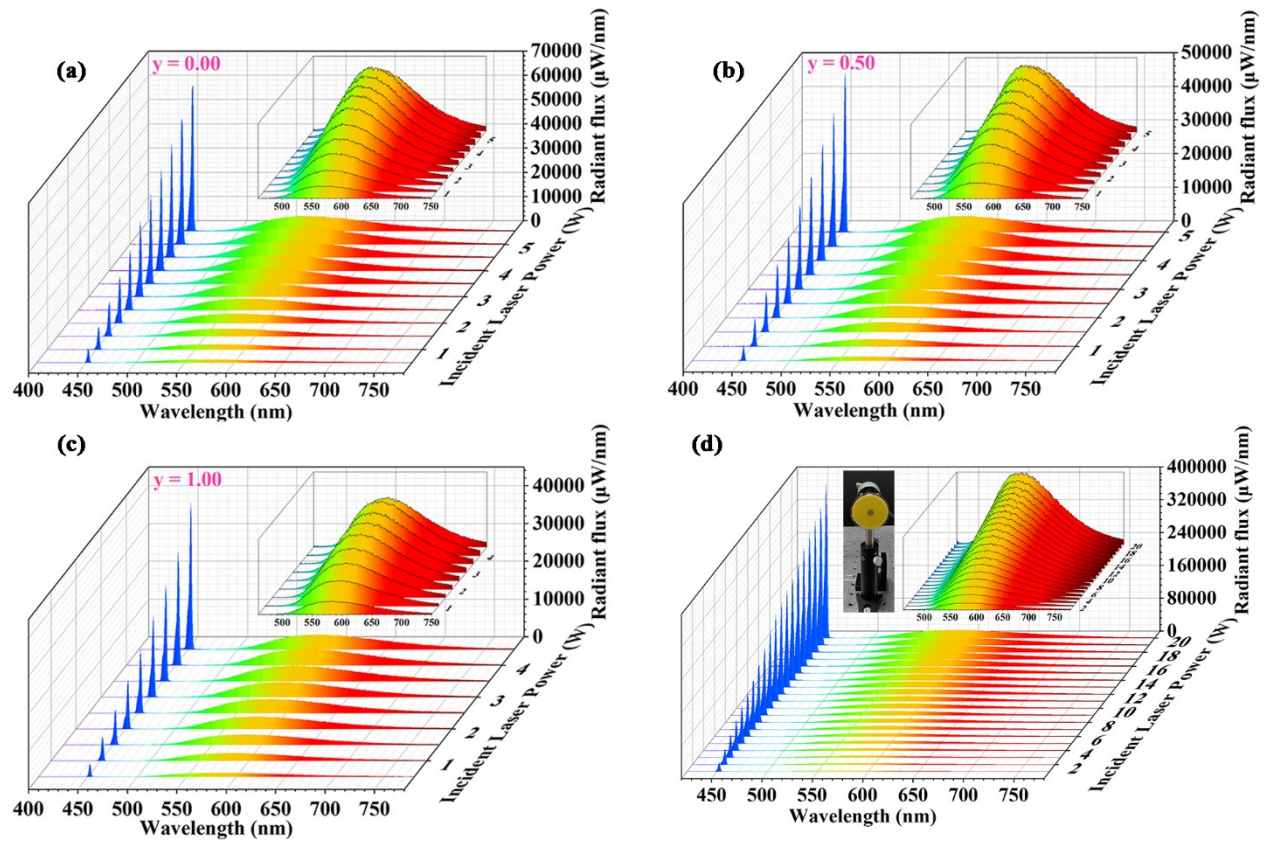

**Figure S14.**  $P_{in}$  dependent EL spectra of L MAGS:  $Ce^{3+}$  PiG film-on-SP with different Ga-concentration: (a)  $y=0.00$ , (b)  $y=0.50$ , and (c)  $y=1.00$ ; insets are the corresponding magnified spectra in the range of 500-700 nm. (d)  $P_{in}$  dependent EL spectra of  $Lu_{1.9}Mg_2Al_2Si_2O_{12}: 0.1Ce^{3+}$  PiG film-on-SP "phosphor wheel" measured under rotatory-reflective mode; insets are the digital photo of phosphor wheel (left) and the enlarged spectra in the region of 500-800 nm (right).



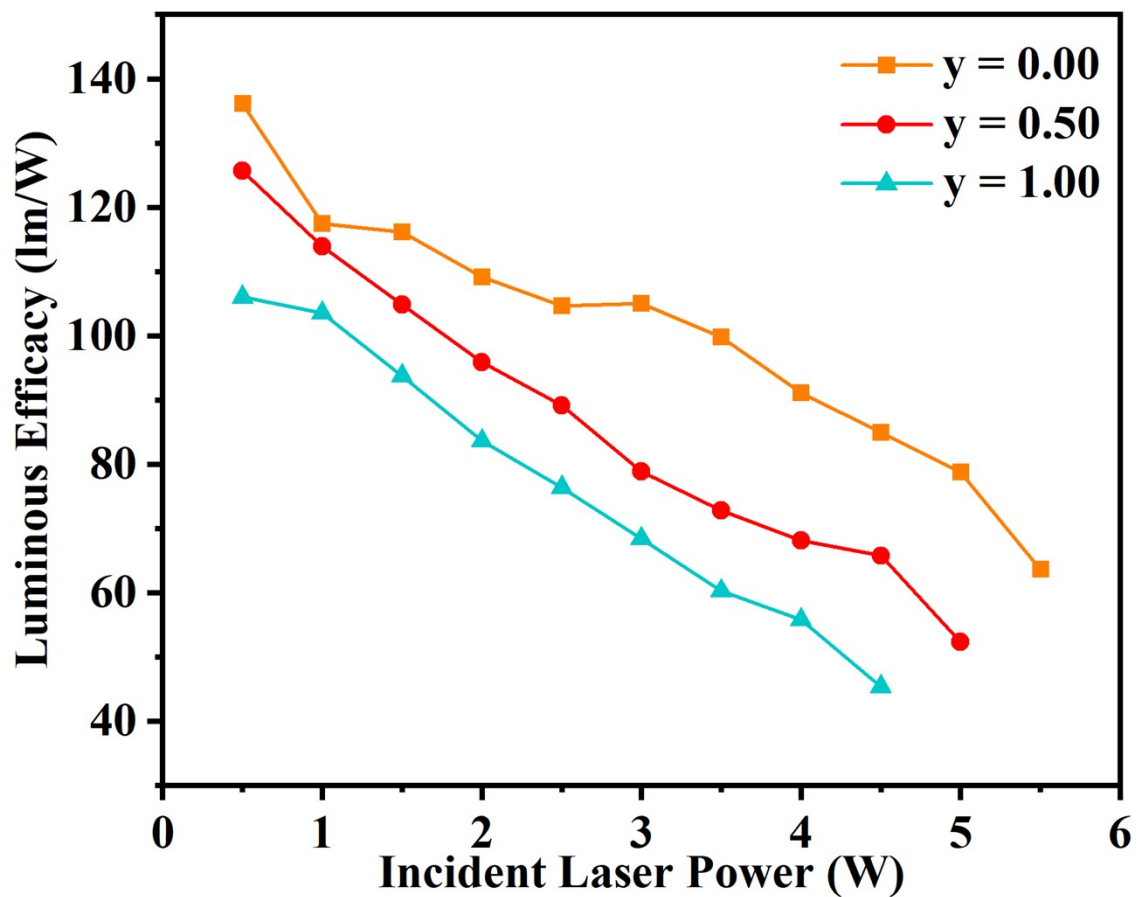

Figure S15. Pumping power dependent luminous efficacy of the LMAGS: Ce<sup>3+</sup> PiG film-on-SP with different Ga-concentration.

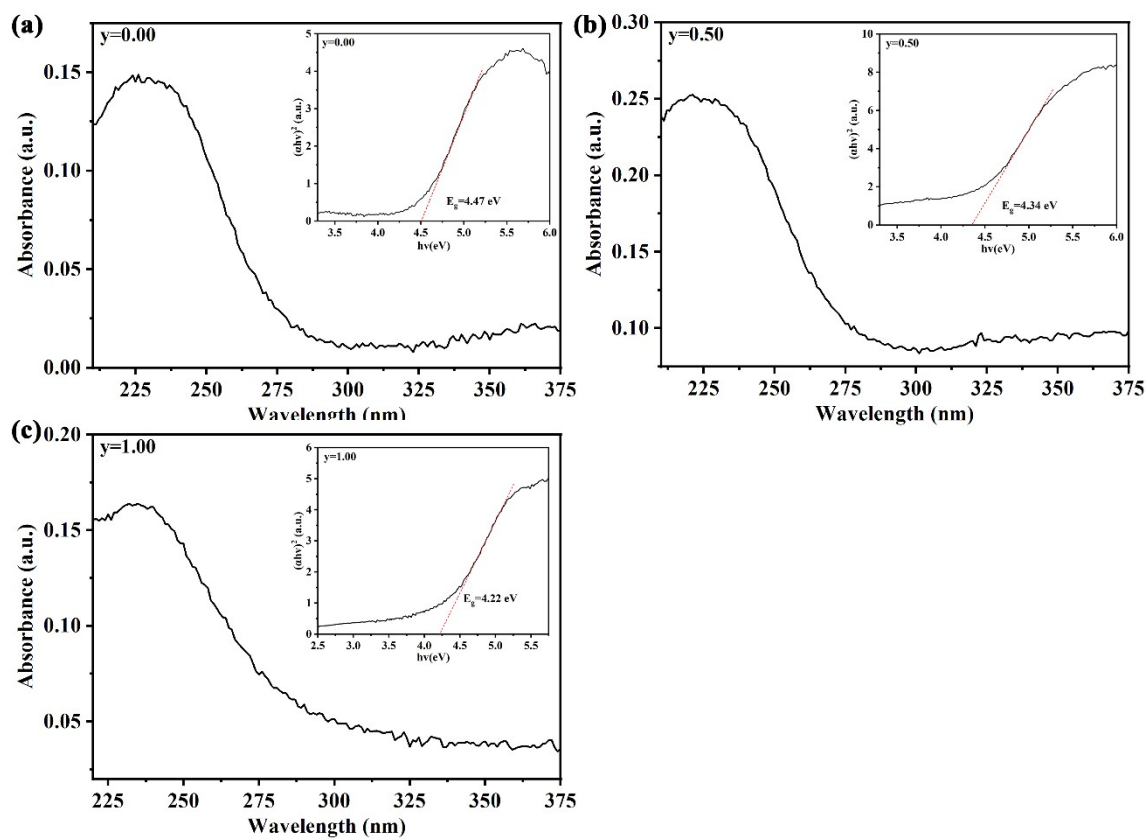

**Figure S16.** Diffuse-reflectance spectrum of the un-doped LMAGS, inset shows the relationship of  $[ah\nu]^2$  versus photon energy  $h\nu$  to determine the optical bandgap of LMAGS.

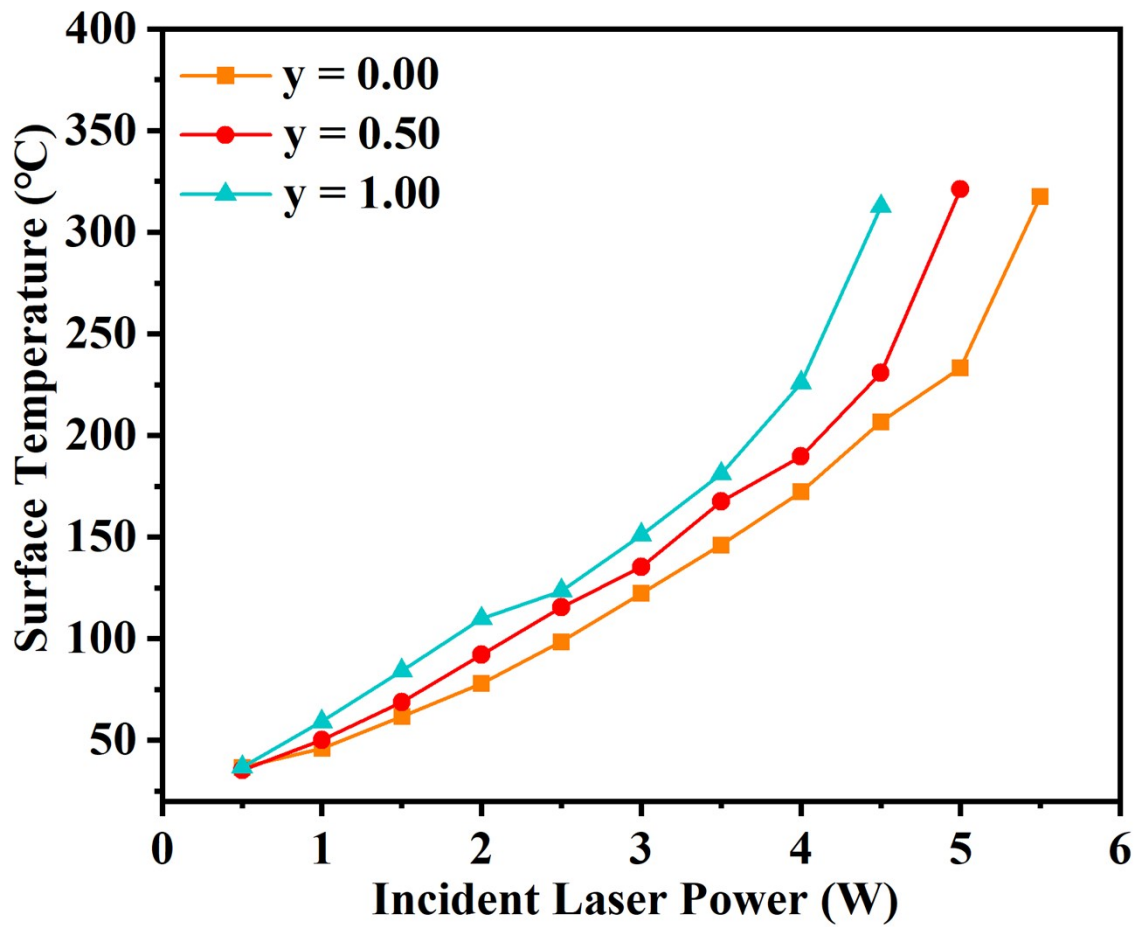

Figure S17. Local temperature of LMAGS: Ce<sup>3+</sup> PiG film-on-SP with different Ga-concentration at the laser spot.

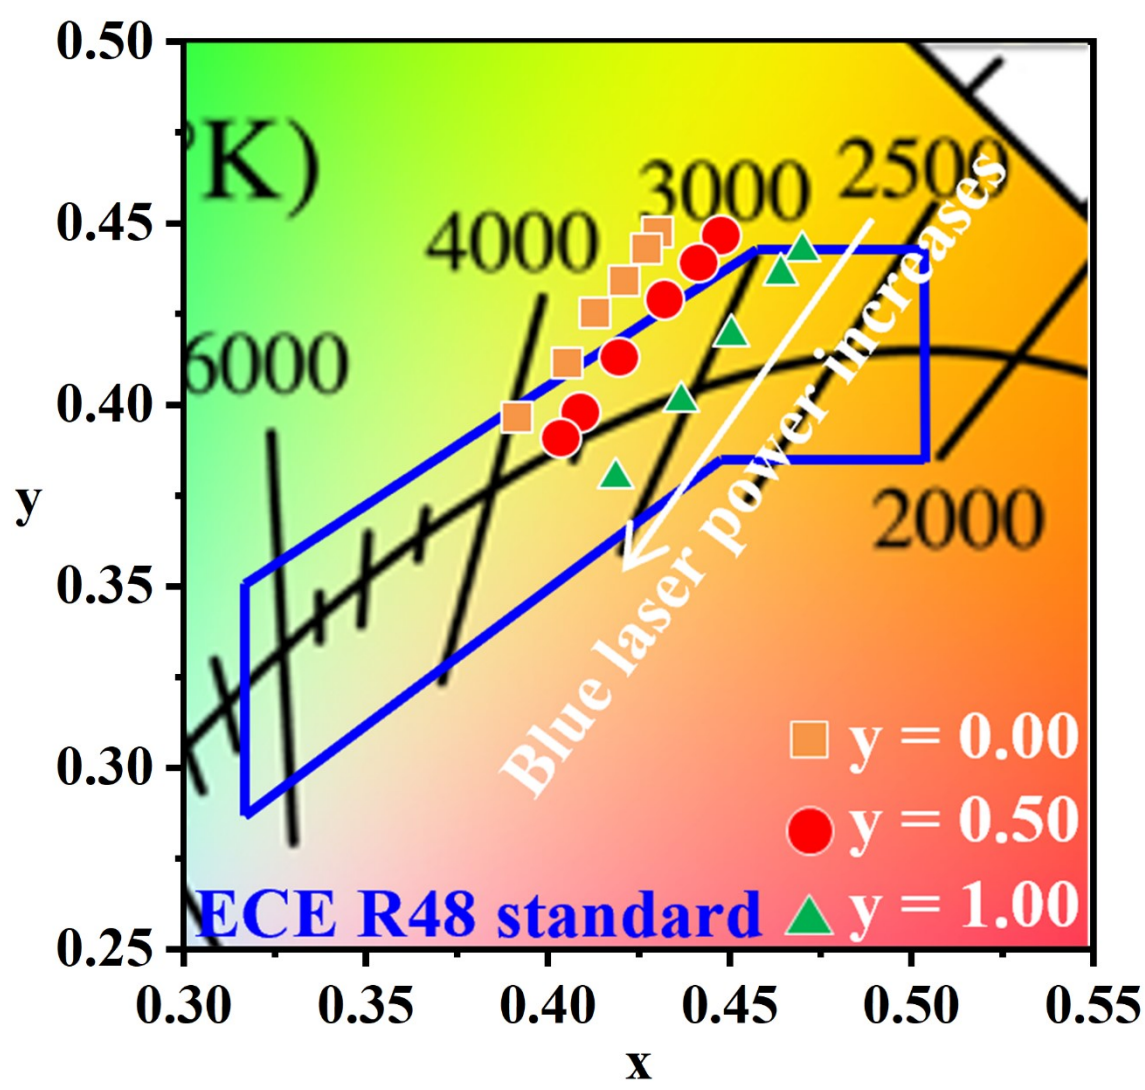

Figure S18. the variations in chromaticity coordinates of LMGs: Ce<sup>3+</sup> PiG film-on-SP with different Ga-concentration.

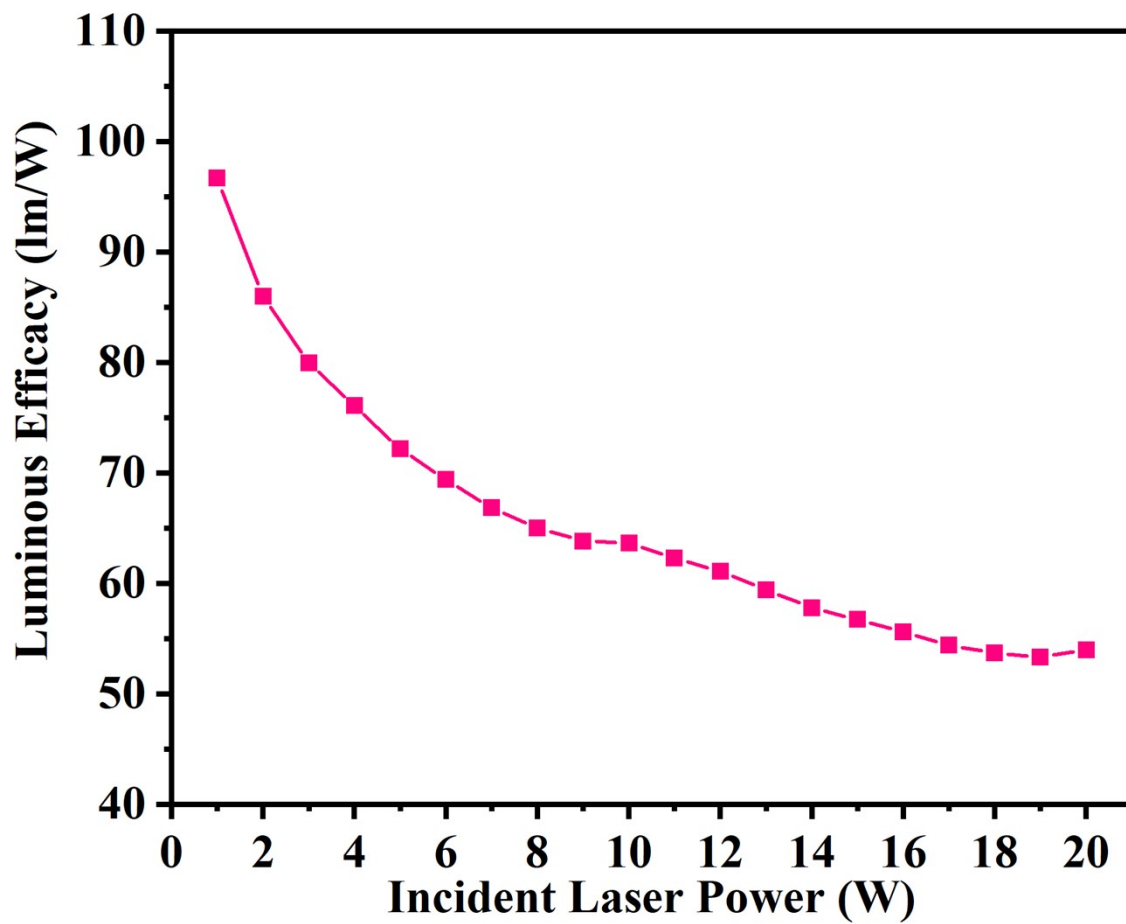

Figure S19. The derived  $P_{in}$  dependent luminous efficacy in rotatory-reflective mode.

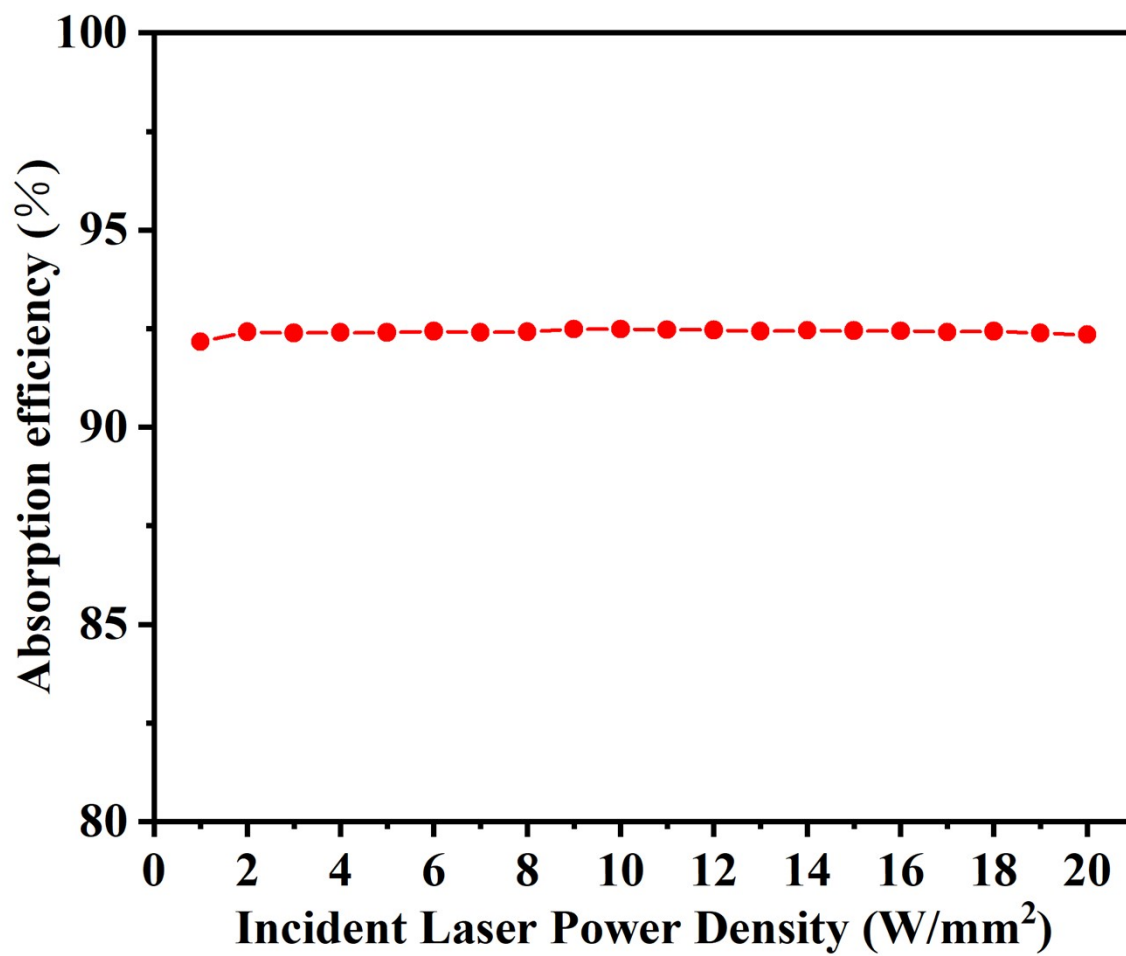

**Figure S20.** The incident power dependent absorption efficiencies of the LMAgS: Ce<sup>3+</sup> PiG film-on-SP under rotatory-reflective mode.

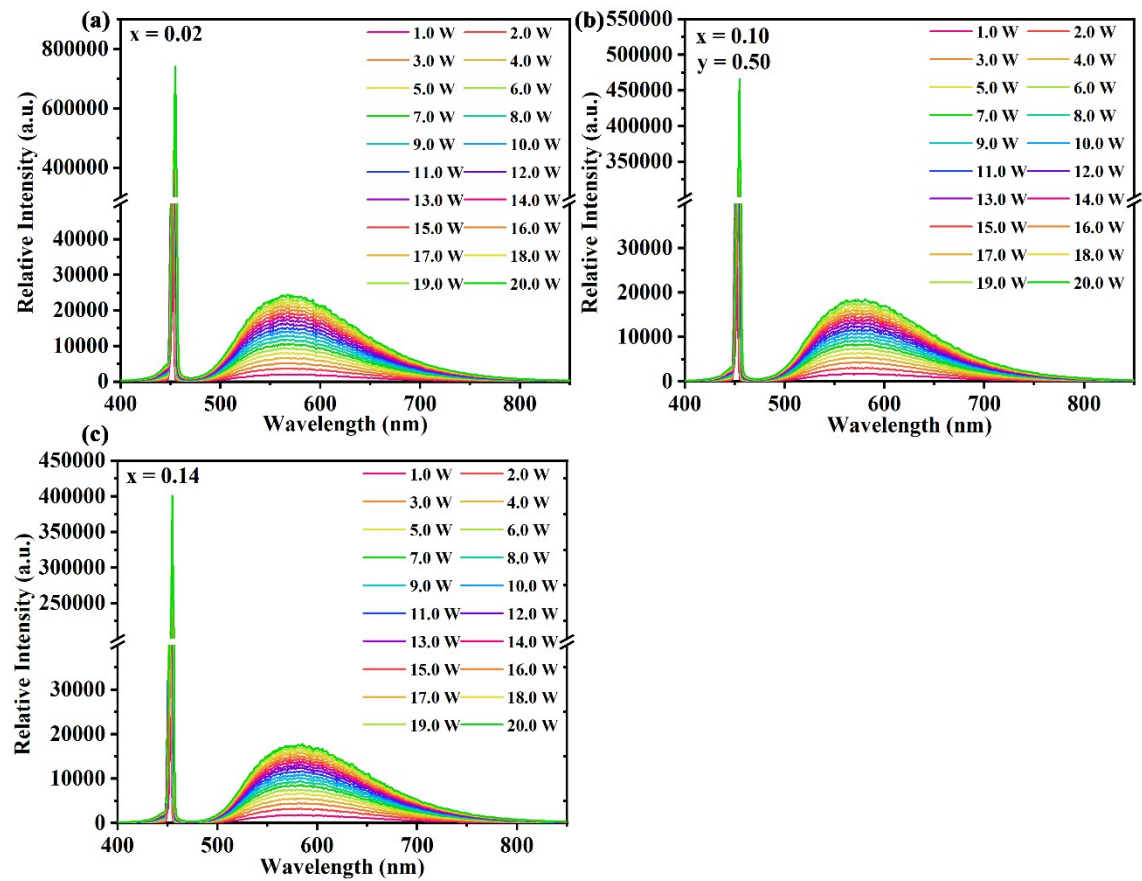

**Figure S21.** EL spectra of L MAGS: Ce PiG film-on-SP with different Ce-concentration under different input power density in rotatory-reflective mode.

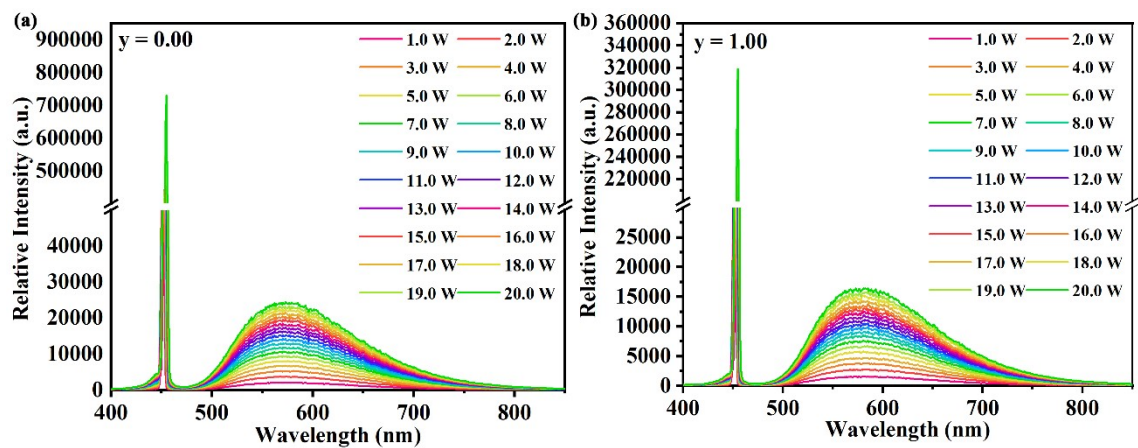

**Figure S22.** EL spectra of LMAGS: Ce PiG film-on-SP with different Ga-concentration under different input power density in rotatory-reflective mode.



## References

- [1] G. Blasse, Luminescence of inorganic solids: from isolated centres to concentrated systems, Prog. Solid State Chem. 18 (1988) 79-171.
- [2] D.L. Dexter, A theory of sensitized luminescence in solids, J. Chem. Phys. 21 (1953) 836-850.
